# Supplementary figures and images for: Synthesis, crystal structure and investigation of ion-exchange possibility for sodium tellurate NaTeO3(OH)
Source: Royal Society of Chemistry journal article supplement (doi:10.1039/d4dt00165f), 2024-01-01

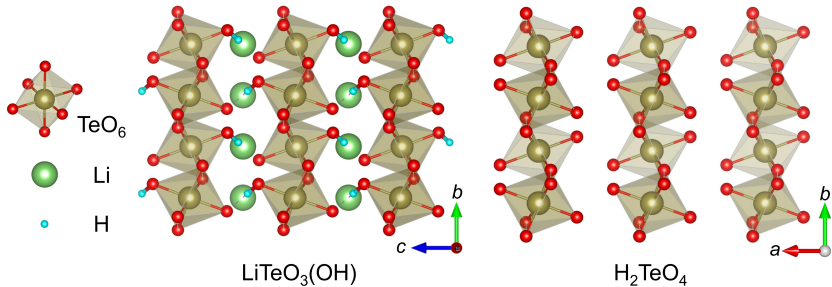

Supplement: d4dt00165f10.pdf [file d4dt00165f10.pdf]

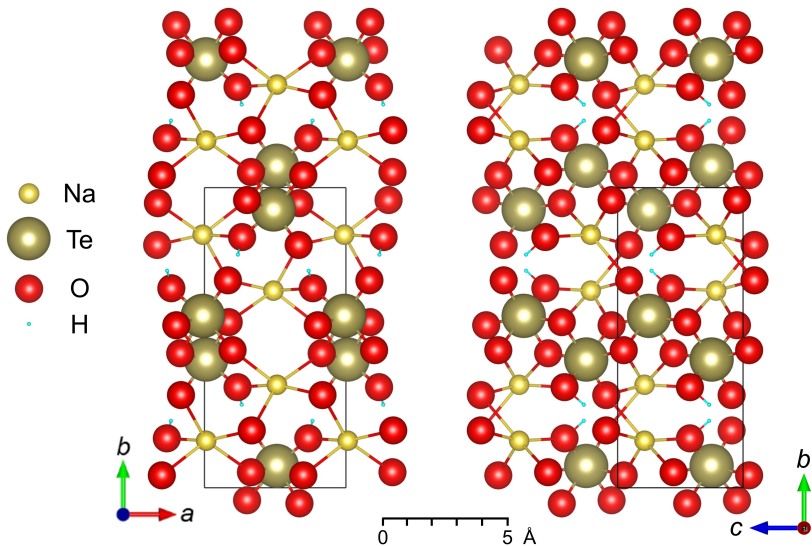

Supplement: d4dt00165f11.pdf [file d4dt00165f11.pdf]

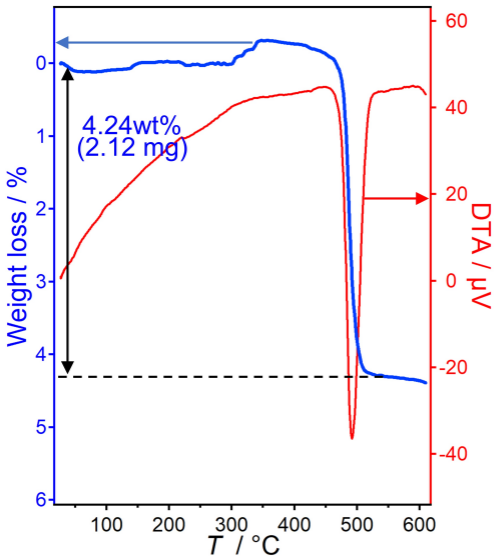

Supplement: d4dt00165f12.pdf [file d4dt00165f12.pdf]

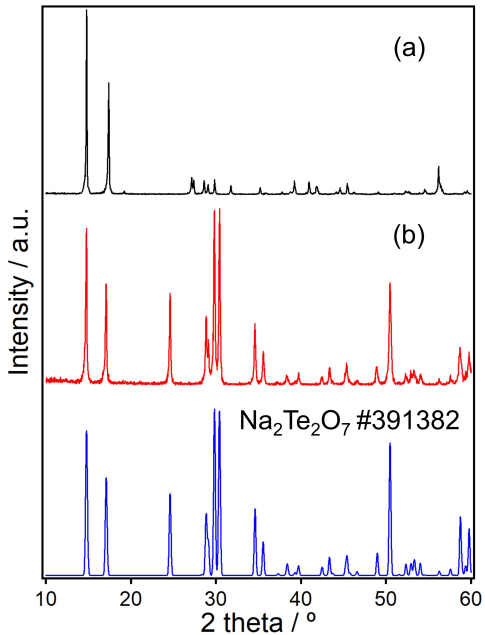

Supplement: d4dt00165f13.pdf [file d4dt00165f13.pdf]

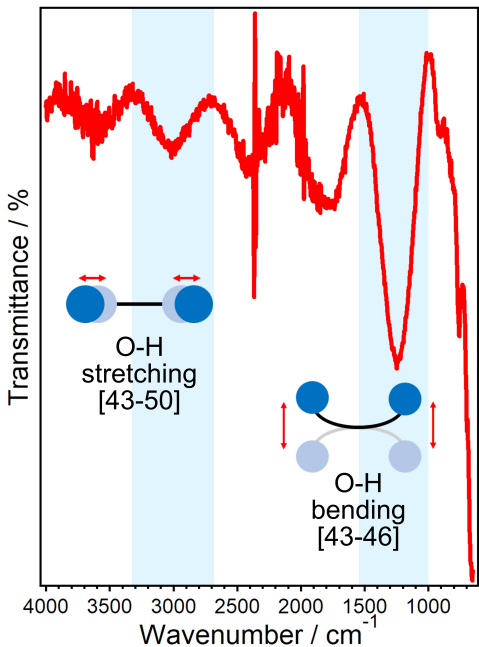

Supplement: d4dt00165f14.pdf [file d4dt00165f14.pdf]

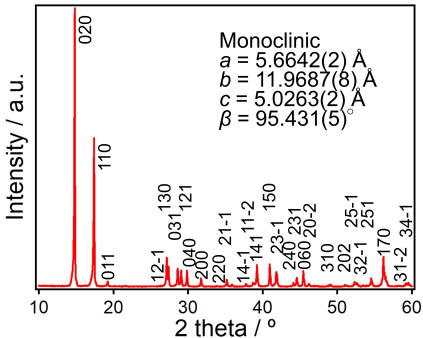

Supplement: d4dt00165f15.pdf [file d4dt00165f15.pdf]

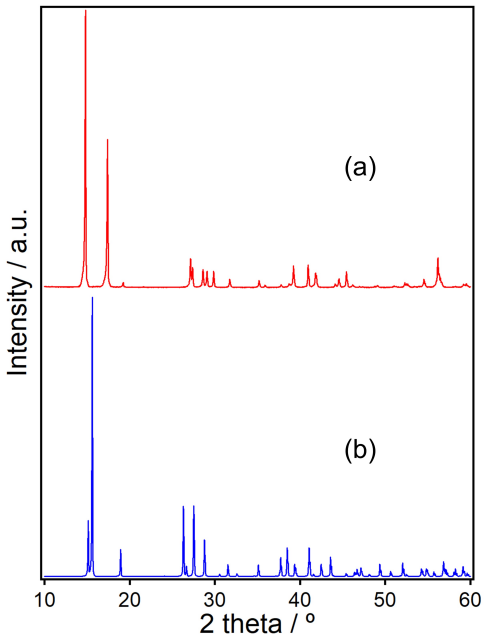

Supplement: d4dt00165f16.pdf [file d4dt00165f16.pdf]

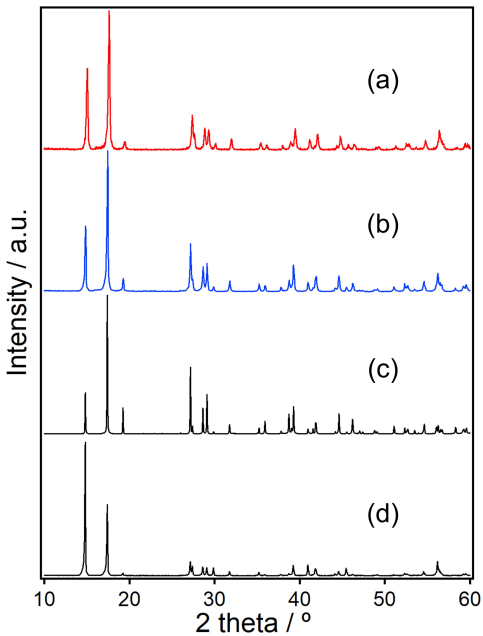

Supplement: d4dt00165f17.pdf [file d4dt00165f17.pdf]

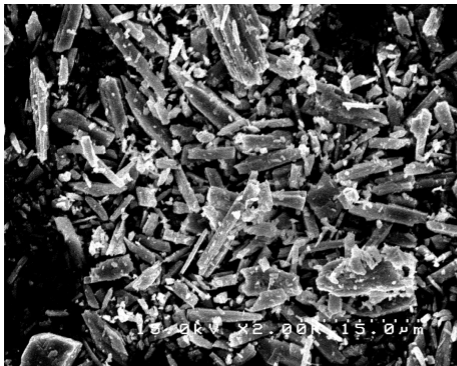

Supplement: d4dt00165f18.pdf [file d4dt00165f18.pdf]

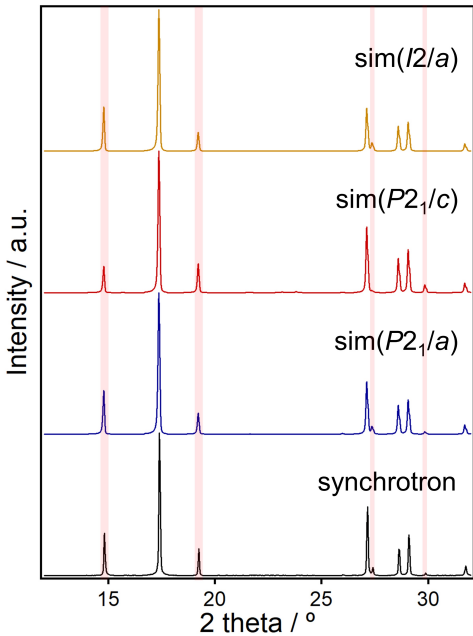

Supplement: d4dt00165f19.pdf [file d4dt00165f19.pdf]

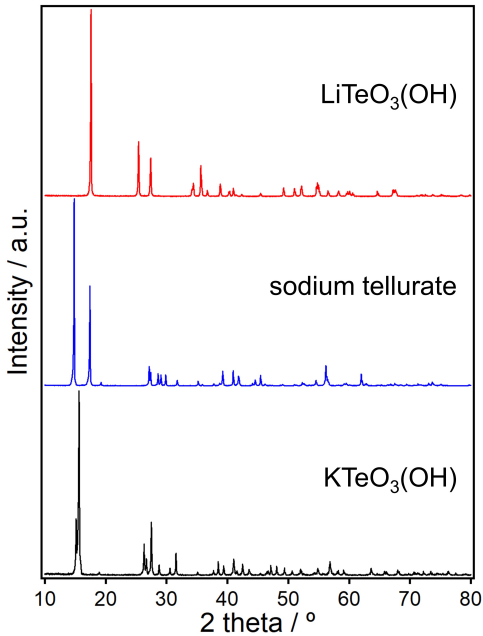

Supplement: d4dt00165f2.pdf [file d4dt00165f2.pdf]

NaTeO<sub>3</sub>(OH), *P2<sub>1</sub>/c*

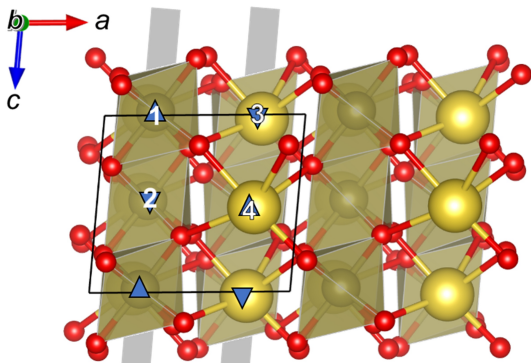

Queue 1 Queue 2

- ▲ Te (0.25210, 0.83582, -0.01814)
- ▼ Te (0.25210, 0.66418, 0.48186)
- ⊕ Te (0.74790, 0.16418, 0.01814)
- ⊖ Te (0.74790, 0.33582, 0.51814)

NaTeO<sub>3</sub>(OH), *P2<sub>1</sub>/a*

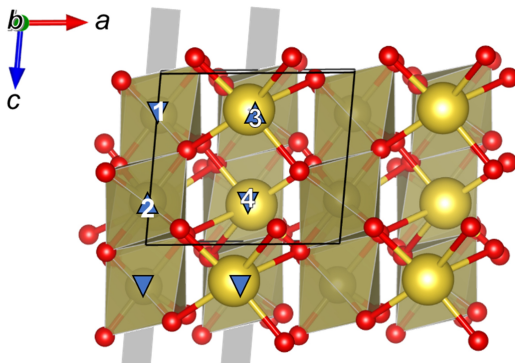

Queue 1 Queue 2

- ▼ Te (0.00840, 0.42727, 0.25140)
- ▲ Te (-0.00840, 0.57273, 0.74860)
- ⊕ Te (0.50840, 0.07273, 0.25140)
- ⊖ Te (0.49160, -0.07273, 0.74860)

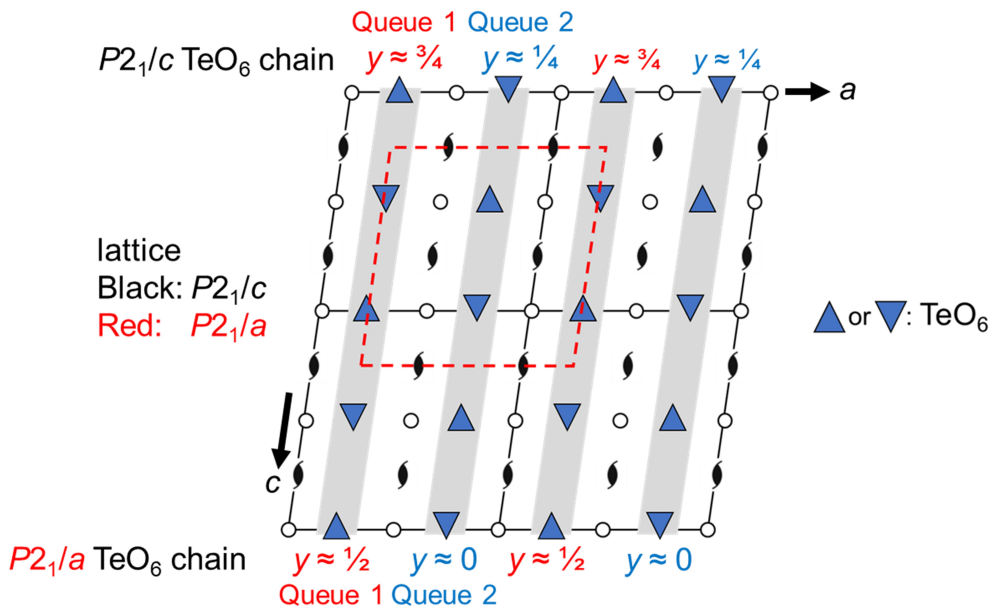

Supplement: d4dt00165f3.pdf [file d4dt00165f3.pdf]

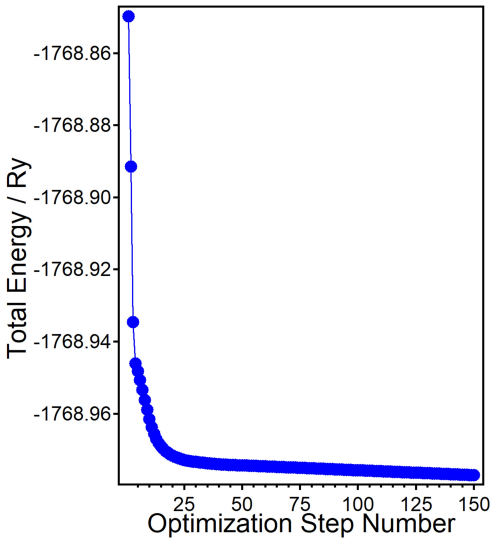

Supplement: d4dt00165f4.pdf [file d4dt00165f4.pdf]

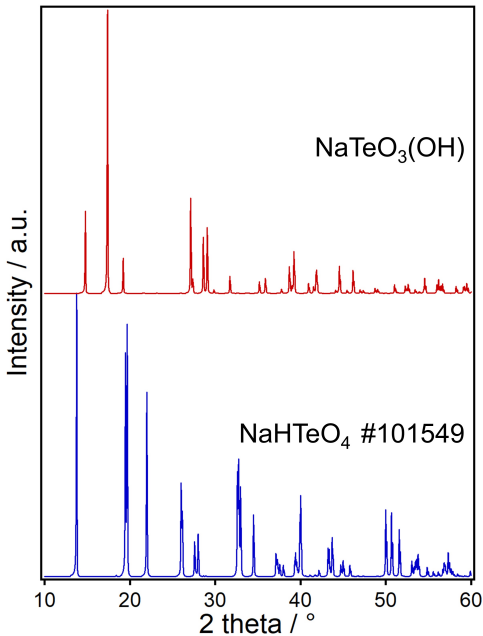

Supplement: d4dt00165f5.pdf [file d4dt00165f5.pdf]

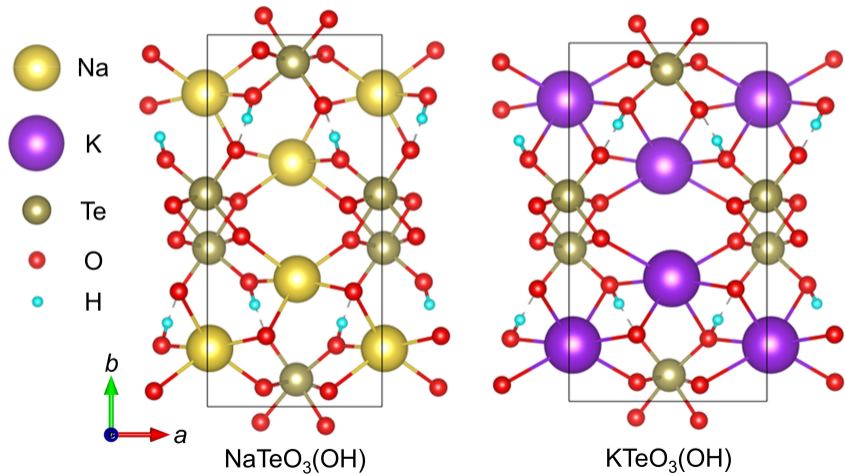

Supplement: d4dt00165f6.pdf [file d4dt00165f6.pdf]

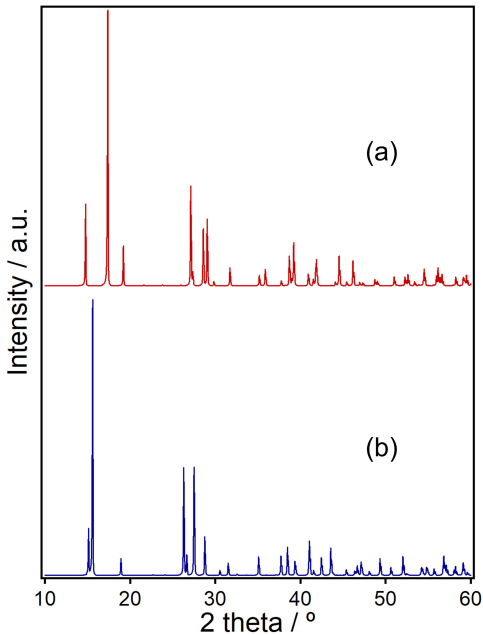

Supplement: d4dt00165f7.pdf [file d4dt00165f7.pdf]

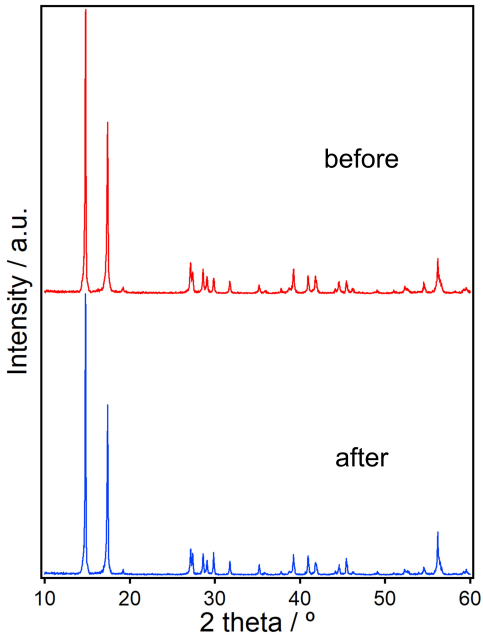

Supplement: d4dt00165f8.pdf [file d4dt00165f8.pdf]

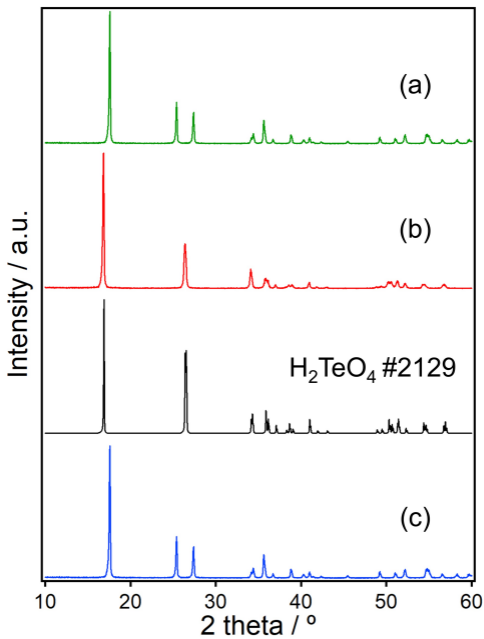

Supplement: d4dt00165f9.pdf [file d4dt00165f9.pdf]
